# Supplementary material for: Krüppel-like factor 3 inhibition by mutated lncRNA Reg1cp results in human high bone mass syndrome
Source: PubMed Central journal article supplement — J Exp Med. 2019 Jun 13;216(8):1944–64. doi: 10.1084/jem.20181554 (PMC6683986; doi:10.1084/jem.20181554), 2019-06-13
Supplement: JEM_20181554_sm.pdf [file JEM_20181554_sm.pdf]

Supplemental material

Yang et al., <https://doi.org/10.1084/jem.20181554>

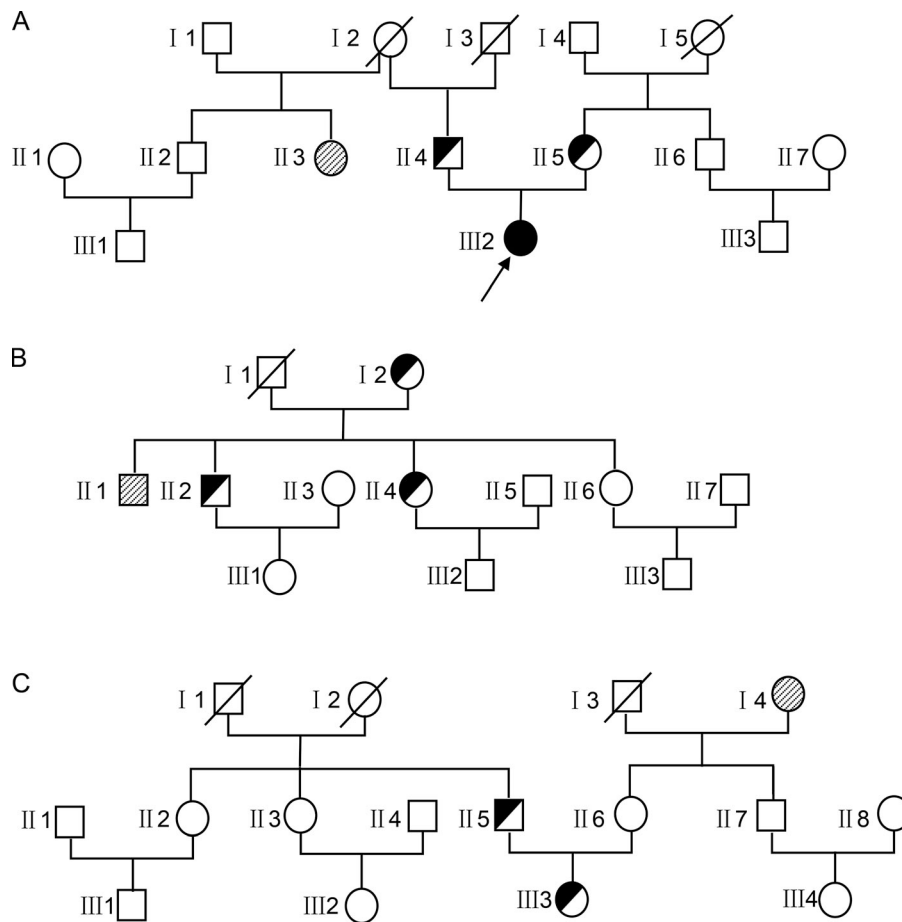

Figure S1. **The family trees of affected subjects.** Schematic representation of the *Reg1cp* genotypes of the three studied families. **(A)** The proband is indicated by an arrow. **(B and C)** Subject II2 in family (B) and subject III3 in family (C) belong to the 67 *Reg1cp<sup>+mut</sup>* subjects identified on cohort study. Squares, male members; circles, female members; slashes, deceased members; shaded symbols, subjects who were not evaluated. *Reg1cp<sup>mut/mut</sup>* is indicated by closed symbols; *Reg1cp<sup>+/+</sup>* is indicated by open symbols; *Reg1cp<sup>+mut</sup>* is indicated by half-shaded symbols.

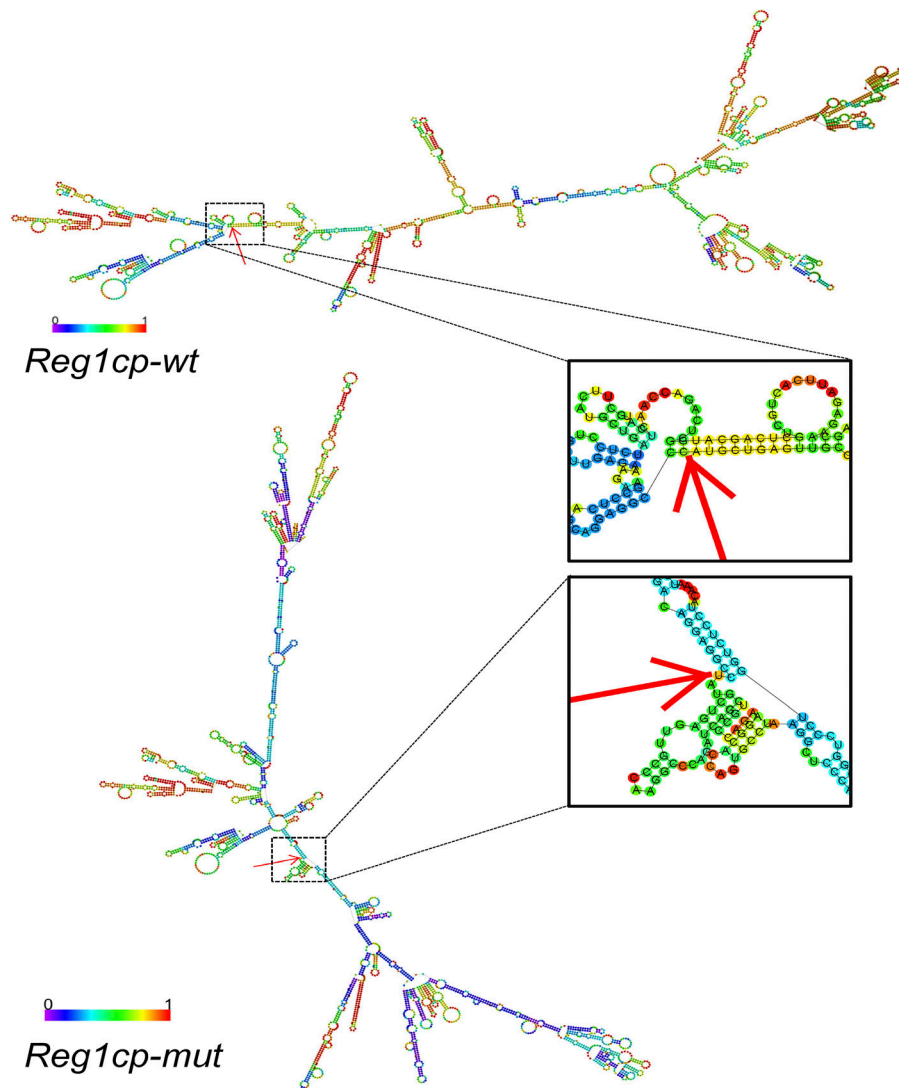

Figure S2. **Secondary structure prediction of *Reg1CP* and mutated *Reg1cp*.** Presenting the predicted secondary structure of *Reg1CP* (*Reg1cp-wt*) and mutated *Reg1cp* (*Reg1cp-mut*; RNAfold Webservice, <http://rna.tbi.univie.ac.at/cgi-bin/RNAfold.cgi>).

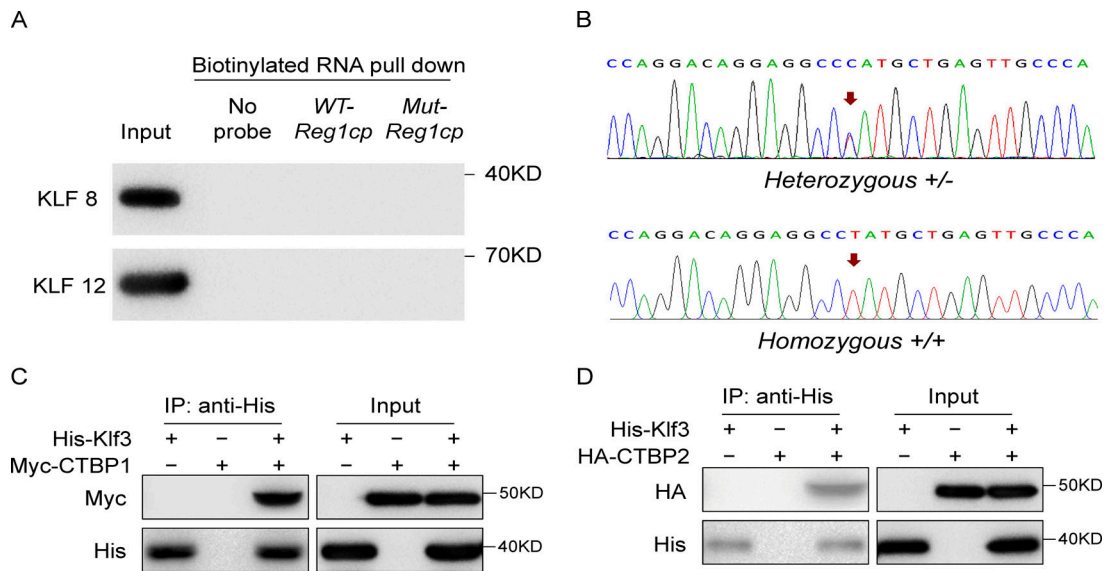

Figure S3. **Mutant *Reg1cp* does not retrieve KLF8 and KLF12 and does not affect the recruitment of corepressors CTBP1 and CTBP2 to Klf3.** (A) The immunoblotting results of mut-*Reg1cp* retrieve KLF8 and KLF12. (B) Sanger sequencing result of HMEC cell line with heterozygous or homozygous mutation in *Reg1cp* gene. (C and D) HMECs were transfected with *Reg1cp-mut* plasmid, His-Klf3, Myc-CTBP1, and HA-CTBP2. Co-immunoprecipitation (IP) of Klf3 and CTBP1 (C) and Klf3 and CTBP2 (D) was performed. Western blot analysis of cell extracts before IP served as input control. All the figures were representative of three independent experiments.

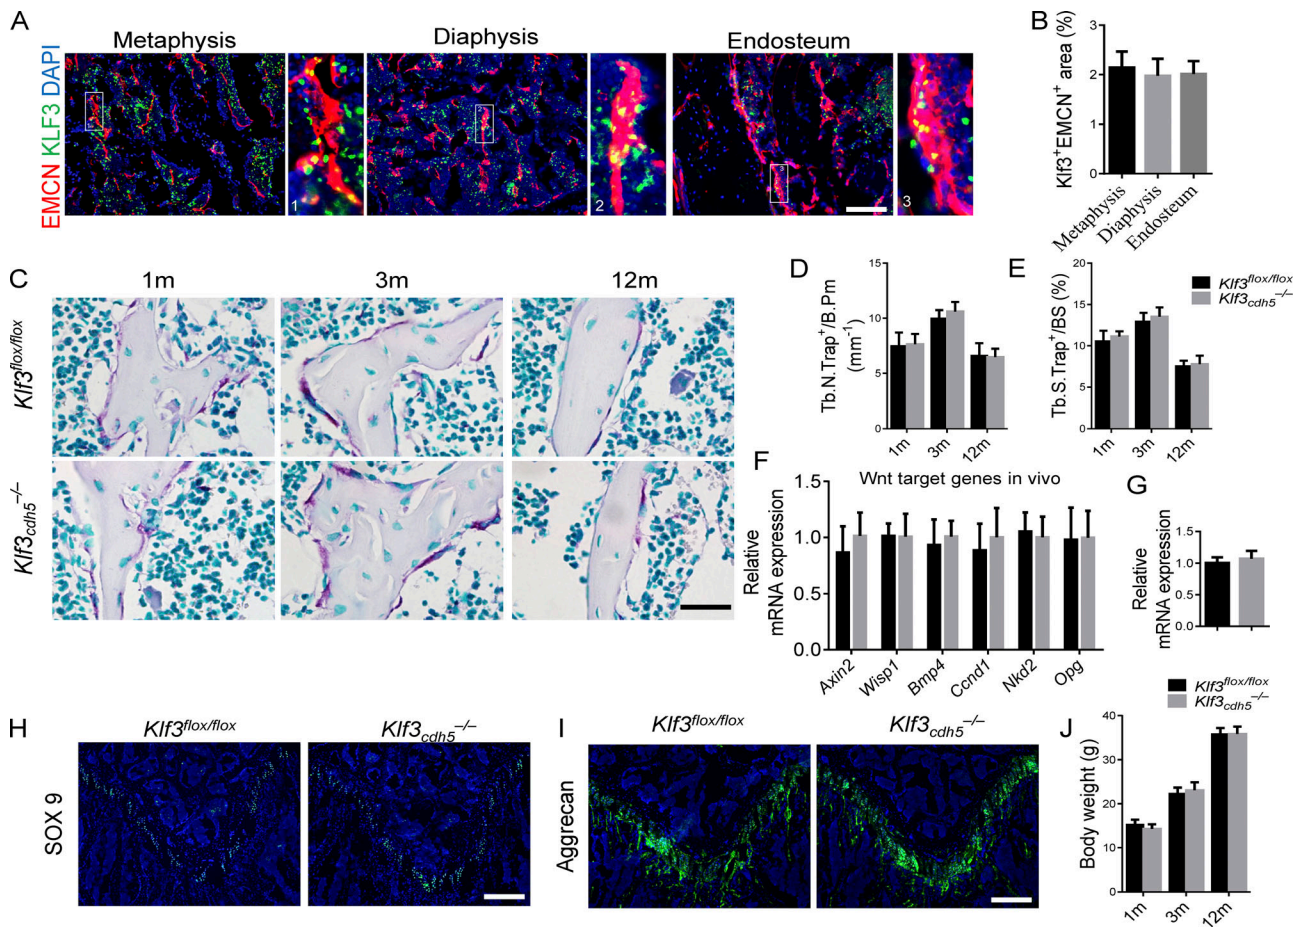

Figure S4. Endothelial-specific *Klf3* knockout mice show no change in osteoclasts number, Wnt signaling, *Tph1* expression, and growth plate morphology. (A and B) Representative images (A) and quantitation (B) of KLF3 (green) and EMCN (red) immunostaining in femora from C57/B6 mice. Scale bar, 100  $\mu$ m. (C) Representative images of TRAP staining of femora from different time point of endothelial-specific *Klf3* knockout mice and their littermate controls. Scale bar, 50  $\mu$ m. (D and E) Quantification data of TRAP<sup>+</sup> cells in trabecular bone surface. Number of TRAP<sup>+</sup> cells per bone perimeter (Tb.N.Trap<sup>+</sup>/B.Pm), and TRAP<sup>+</sup> cells surface per bone surface (Tb.S.Trap<sup>+</sup>/BS) were measured. (F) qRT-PCR analysis of Wnt target genes in the bones of endothelial-specific *Klf3* knockout mice and their littermate controls. (G) qRT-PCR analysis of *Tph1* in the duodenum of endothelial-specific *Klf3* knockout mice and their littermate controls. (H) Representative images of SOX 9 staining of femora. Scale bar, 200  $\mu$ m. (I) Representative images of Aggrecan staining of femora. Scale bar, 200  $\mu$ m. (J) Body weight of endothelial-specific *Klf3* knockout mice and their littermate controls.  $n = 6$  in each group from three independent experiments. Data shown as mean  $\pm$  SD. Student's *t* test.

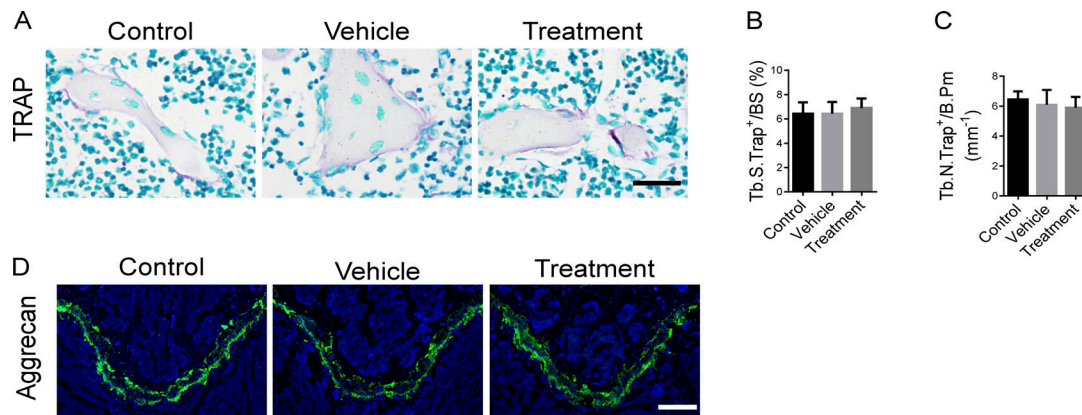

Figure S5. **Ophiopogonin D treatment does not affect osteoclast number and growth plate morphology in aged mice.** 12-mo-old C57/B6 mice were intraperitoneally treated with Ophiopogonin D at a dosage of 20 mg/kg every other day for 3 mo. **(A)** Representative images of TRAP staining of femora from Ophiopogonin D-treated mice and their controls. Bar, 50  $\mu$ m. **(B and C)** Quantification data of TRAP<sup>+</sup> cells in trabecular bone surface. Number of TRAP<sup>+</sup> cells per bone perimeter (Tb.N. Trap<sup>+</sup>/B.Pm), and TRAP<sup>+</sup> cells surface per bone surface (Tb.S.Trap<sup>+</sup>/BS) were measured. **(D)** Representative images of Aggrecan staining of femora from Ophiopogonin D-treated mice and their controls. Scale bar, 200  $\mu$ m.  $n = 6$  in each group from three independent experiments. Data shown as mean  $\pm$  SD. ANOVA.

Table S1. Clinical information of the 67 *Reg1cp*<sup>+/mut</sup> individuals

| Subject | Gender | Age (yr) | Menopause | BMI (kg/m <sup>2</sup> ) | Total lumbar spine BMD (g/cm <sup>2</sup> ) | Z-score for BMD at total lumbar spine | Femoral neck BMD (g/cm <sup>2</sup> ) | Z-score for BMD at femoral neck | Total hip BMD (g/cm <sup>2</sup> ) | Z-score for BMD at total hip | β-CTX (pg/ml) | PINP (ng/ml) |
|---------|--------|----------|-----------|--------------------------|---------------------------------------------|---------------------------------------|---------------------------------------|---------------------------------|------------------------------------|------------------------------|---------------|--------------|
| 1       | Female | 22       | No        | 20.57                    | 1.185                                       | 2.8                                   | 0.949                                 | 1.6                             | 1.083                              | 2.2                          | 69.51         | 431.81       |
| 2       | Female | 26       | No        | 21.21                    | 0.965                                       | 0.3                                   | 0.901                                 | 1.4                             | 0.996                              | 1.8                          | 68.19         | 442.10       |
| 3       | Female | 30       | No        | 22.64                    | 1.079                                       | 1.1                                   | 0.923                                 | 1.1                             | 0.946                              | 0.8                          | 63.20         | 364.48       |
| 4       | Female | 31       | No        | 16.23                    | 1.083                                       | 1.2                                   | 0.930                                 | 1.2                             | 0.956                              | 0.8                          | 60.39         | 280.30       |
| 5       | Female | 32       | No        | 23.19                    | 1.077                                       | 1.1                                   | 0.945                                 | 1.3                             | 1.064                              | 1.8                          | 60.20         | 296.87       |
| 6       | Female | 33       | No        | 23.61                    | 1.060                                       | 0.9                                   | 1.088                                 | 2.7                             | 1.162                              | 2.7                          | 66.54         | 249.42       |
| 7       | Female | 33       | No        | 21.93                    | 1.013                                       | 0.5                                   | 0.976                                 | 1.6                             | 1.014                              | 1.4                          | 55.96         | 385.53       |
| 8       | Female | 35       | No        | 21.71                    | 1.249                                       | 2.7                                   | 0.993                                 | 1.9                             | 1.094                              | 2.1                          | 63.20         | 292.71       |
| 9       | Female | 36       | No        | 24.02                    | 0.885                                       | -1.0                                  | 0.849                                 | 0.1                             | 0.970                              | 0.2                          | 62.59         | 243.55       |
| 10      | Female | 37       | No        | 25.00                    | 1.435                                       | 4.0                                   | 1.032                                 | 2.0                             | 1.188                              | 2.3                          | 64.30         | 307.09       |
| 11      | Female | 38       | No        | 24.10                    | 0.978                                       | 0.1                                   | 1.034                                 | 2.3                             | 1.116                              | 2.3                          | 51.17         | 384.11       |
| 12      | Female | 40       | No        | 21.34                    | 1.019                                       | 0.6                                   | 0.673                                 | -1.1                            | 0.833                              | -0.3                         | 28.97         | 237.16       |
| 13      | Female | 41       | No        | 23.65                    | 1.098                                       | 1.3                                   | 0.828                                 | 0.3                             | 0.927                              | 0.5                          | 48.74         | 361.79       |
| 14      | Female | 41       | No        | 23.81                    | 1.073                                       | 1.1                                   | 0.942                                 | 1.4                             | 0.976                              | 1.1                          | 56.13         | 268.50       |
| 15      | Female | 43       | No        | 23.10                    | 0.990                                       | 0.5                                   | 0.605                                 | -1.6                            | 0.758                              | -0.8                         | 37.15         | 357.74       |
| 16      | Female | 44       | No        | 23.50                    | 1.118                                       | 1.7                                   | 0.739                                 | -0.4                            | 0.883                              | 0.3                          | 34.91         | 317.31       |
| 17      | Female | 44       | No        | 28.84                    | 0.986                                       | 0.3                                   | 0.910                                 | 1.1                             | 0.890                              | 0.3                          | 45.44         | 279.61       |
| 18      | Female | 45       | No        | 21.36                    | 1.097                                       | 1.4                                   | 0.885                                 | 1.1                             | 0.825                              | -0.2                         | 41.51         | 355.72       |
| 19      | Female | 45       | No        | 30.04                    | 1.014                                       | 0.7                                   | 0.936                                 | 1.6                             | 1.001                              | 1.5                          | 53.19         | 276.61       |
| 20      | Female | 47       | No        | 23.24                    | 0.946                                       | 0.2                                   | 0.889                                 | 1.1                             | 0.974                              | 1.2                          | 58.43         | 269.04       |
| 21      | Female | 48       | Yes       | 29.01                    | 1.108                                       | 1.5                                   | 0.973                                 | 1.2                             | 1.102                              | 1.2                          | 32.43         | 338.79       |
| 22      | Female | 46       | Yes       | 25.64                    | 1.228                                       | 2.5                                   | 0.888                                 | 1.1                             | 0.954                              | 1.0                          | 47.86         | 201.04       |
| 23      | Female | 47       | Yes       | 26.52                    | 1.167                                       | 2.0                                   | 0.910                                 | 1.3                             | 0.990                              | 1.4                          | 49.90         | 342.56       |
| 24      | Female | 47       | Yes       | 27.60                    | 0.924                                       | 0.0                                   | 0.918                                 | 1.4                             | 0.901                              | 0.5                          | 52.24         | 380.48       |
| 25      | Female | 48       | Yes       | 32.62                    | 1.145                                       | 1.8                                   | 0.996                                 | 2.2                             | 1.152                              | 2.9                          | 58.41         | 311.24       |
| 26      | Female | 49       | Yes       | 29.71                    | 0.907                                       | -0.1                                  | 0.991                                 | 2.1                             | 1.094                              | 2.3                          | 64.15         | 302.64       |
| 27      | Female | 49       | Yes       | 23.94                    | 1.089                                       | 1.3                                   | 0.910                                 | 1.3                             | 1.042                              | 1.8                          | 57.86         | 352.86       |
| 28      | Female | 49       | Yes       | 29.90                    | 1.063                                       | 1.1                                   | 0.978                                 | 2.0                             | 0.936                              | 0.9                          | 77.13         | 344.39       |
| 29      | Female | 50       | Yes       | 25.56                    | 1.119                                       | 2.1                                   | 0.872                                 | 1.4                             | 0.938                              | 1.3                          | 46.43         | 403.06       |
| 30      | Female | 52       | Yes       | 38.58                    | 1.143                                       | 2.3                                   | 1.074                                 | 3.3                             | 1.069                              | 2.6                          | 61.20         | 395.17       |
| 31      | Female | 52       | Yes       | 21.94                    | 1.049                                       | 1.6                                   | 0.853                                 | 1.2                             | 0.935                              | 1.3                          | 49.21         | 429.10       |
| 32      | Female | 54       | Yes       | 30.76                    | 0.911                                       | 0.4                                   | 0.908                                 | 1.7                             | 0.985                              | 1.8                          | 62.96         | 409.81       |
| 33      | Female | 55       | Yes       | 28.31                    | 1.247                                       | 3.4                                   | 0.852                                 | 1.7                             | 0.917                              | 0.3                          | 48.91         | 415.45       |
| 34      | Female | 56       | Yes       | 29.05                    | 0.918                                       | 1.1                                   | 0.815                                 | 1.3                             | 0.836                              | -0.3                         | 52.52         | 382.10       |
| 35      | Female | 56       | Yes       | 24.24                    | 0.855                                       | 0.6                                   | 0.826                                 | 1.4                             | 0.892                              | 0.1                          | 36.62         | 364.23       |
| 36      | Female | 56       | Yes       | 29.30                    | 0.934                                       | 1.2                                   | 0.790                                 | 1.1                             | 0.881                              | 0.0                          | 52.52         | 349.38       |
| 37      | Female | 57       | Yes       | 22.31                    | 0.885                                       | 0.8                                   | 0.808                                 | 1.2                             | 0.845                              | -0.2                         | 37.12         | 374.73       |
| 38      | Female | 58       | Yes       | 26.37                    | 0.953                                       | 1.3                                   | 0.882                                 | 2.0                             | 1.021                              | 1.2                          | 59.64         | 472.44       |
| 39      | Female | 64       | Yes       | 24.36                    | 0.976                                       | 2.2                                   | 0.640                                 | 0.1                             | 0.794                              | 0.9                          | 53.90         | 414.21       |
| 40      | Female | 68       | Yes       | 18.80                    | 0.592                                       | -1.0                                  | 0.534                                 | -0.6                            | 0.639                              | -0.2                         | 40.81         | 407.22       |
| 41      | Female | 74       | Yes       | 30.08                    | 0.832                                       | 0.8                                   | 0.724                                 | 1.3                             | 0.849                              | 0.5                          | 46.15         | 382.61       |
| 42      | Male   | 23       | -         | 21.36                    | 1.166                                       | 1.8                                   | 1.042                                 | 1.3                             | 1.243                              | 2.4                          | 85.38         | 593.50       |

Table S1. Clinical information of the 67 *Reg1cp<sup>+/-mut</sup>* individuals (Continued)

| Subject | Gender | Age (yr) | Menopause | BMI (kg/m <sup>2</sup> ) | Total lumbar spine BMD (g/cm <sup>2</sup> ) | Z-score for BMD at total lumbar spine | Femoral neck BMD (g/cm <sup>2</sup> ) | Z-score for BMD at femoral neck | Total hip BMD (g/cm <sup>2</sup> ) | Z-score for BMD at total hip | β-CTX (pg/ml) | PINP (ng/ml) |
|---------|--------|----------|-----------|--------------------------|---------------------------------------------|---------------------------------------|---------------------------------------|---------------------------------|------------------------------------|------------------------------|---------------|--------------|
| 43      | Male   | 27       | -         | 24.57                    | 1.139                                       | 1.5                                   | 1.106                                 | 2.0                             | 1.092                              | 1.3                          | 89.75         | 604.56       |
| 44      | Male   | 28       | -         | 20.34                    | 0.954                                       | -0.1                                  | 0.920                                 | 0.7                             | 1.011                              | 0.7                          | 64.07         | 386.06       |
| 45      | Male   | 30       | -         | 21.22                    | 1.151                                       | 1.8                                   | 0.937                                 | 0.9                             | 1.006                              | 0.7                          | 58.92         | 408.86       |
| 46      | Male   | 30       | -         | 22.23                    | 1.034                                       | 0.7                                   | 1.103                                 | 2.5                             | 1.145                              | 2.0                          | 64.20         | 377.23       |
| 47      | Male   | 32       | -         | 27.05                    | 0.998                                       | 0.4                                   | 0.992                                 | 1.5                             | 1.098                              | 1.6                          | 60.91         | 402.16       |
| 48      | Male   | 35       | -         | 28.03                    | 1.254                                       | 2.5                                   | 1.070                                 | 2.6                             | 1.194                              | 2.8                          | 79.75         | 469.07       |
| 49      | Male   | 36       | -         | 28.63                    | 1.080                                       | 0.8                                   | 0.920                                 | 0.8                             | 1.053                              | 1.0                          | 52.33         | 401.09       |
| 50      | Male   | 44       | -         | 23.51                    | 1.001                                       | 0.2                                   | 0.783                                 | -0.2                            | 0.832                              | -0.8                         | 44.56         | 396.11       |
| 51      | Male   | 44       | -         | 25.45                    | 0.962                                       | -0.2                                  | 0.981                                 | 1.7                             | 1.042                              | 1.1                          | 53.04         | 368.65       |
| 52      | Male   | 47       | -         | 23.85                    | 0.870                                       | -0.9                                  | 0.789                                 | 0.0                             | 0.831                              | -0.7                         | 45.52         | 378.64       |
| 53      | Male   | 50       | -         | 29.59                    | 1.129                                       | 1.4                                   | 0.949                                 | 1.8                             | 1.184                              | 2.5                          | 63.08         | 395.45       |
| 54      | Male   | 48       | -         | 25.31                    | 1.075                                       | 1.1                                   | 0.845                                 | 0.6                             | 1.004                              | 1.1                          | 45.22         | 337.48       |
| 55      | Male   | 50       | -         | 22.49                    | 0.982                                       | 0.2                                   | 1.074                                 | 3.1                             | 1.193                              | 2.8                          | 65.60         | 382.93       |
| 56      | Male   | 50       | -         | 22.86                    | 1.108                                       | 1.2                                   | 0.965                                 | 2.0                             | 1.158                              | 2.5                          | 53.41         | 352.24       |
| 57      | Male   | 54       | -         | 24.73                    | 1.210                                       | 2.1                                   | 0.884                                 | 1.1                             | 1.071                              | 1.7                          | 51.77         | 363.79       |
| 58      | Male   | 54       | -         | 24.25                    | 1.176                                       | 1.8                                   | 0.876                                 | 1.0                             | 1.079                              | 1.7                          | 43.80         | 322.38       |
| 59      | Male   | 54       | -         | 28.55                    | 1.099                                       | 1.2                                   | 0.901                                 | 1.3                             | 1.079                              | 1.7                          | 52.38         | 282.98       |
| 60      | Male   | 57       | -         | 27.43                    | 1.094                                       | 1.1                                   | 0.851                                 | 1.0                             | 1.047                              | 1.5                          | 44.26         | 405.99       |
| 61      | Male   | 59       | -         | 24.09                    | 1.281                                       | 2.5                                   | 0.904                                 | 1.6                             | 1.072                              | 1.7                          | 48.98         | 378.67       |
| 62      | Male   | 64       | -         | 25.34                    | 1.089                                       | 1.0                                   | 0.887                                 | 1.3                             | 0.914                              | 0.3                          | 47.72         | 389.66       |
| 63      | Male   | 65       | -         | 23.45                    | 1.206                                       | 1.7                                   | 0.751                                 | 0.2                             | 1.015                              | 1.2                          | 47.63         | 304.95       |
| 64      | Male   | 66       | -         | 20.05                    | 0.841                                       | -0.6                                  | 0.651                                 | -0.3                            | 0.824                              | 0.0                          | 48.37         | 337.81       |
| 65      | Male   | 69       | -         | 24.97                    | 1.082                                       | 1.4                                   | 0.903                                 | 2.2                             | 0.951                              | 1.2                          | 55.15         | 322.40       |
| 66      | Male   | 72       | -         | 26.08                    | 1.069                                       | 0.8                                   | 0.881                                 | 1.5                             | 1.016                              | 1.4                          | 37.94         | 335.11       |
| 67      | Male   | 74       | -         | 23.29                    | 1.114                                       | 1.1                                   | 0.894                                 | 1.6                             | 0.986                              | 1.2                          | 50.86         | 299.53       |

BMI, body mass index.

Table S2. Index of bone mass in 26 male *Reg1cp<sup>+/-mut</sup>* individuals and 590 male *Reg1cp<sup>+/+</sup>* individuals

| Age (yr) | Index                    | Lumbar                      |                                | Femoral neck                |                                | Hip                         |                                | Subjects (n)                |                                |
|----------|--------------------------|-----------------------------|--------------------------------|-----------------------------|--------------------------------|-----------------------------|--------------------------------|-----------------------------|--------------------------------|
|          |                          | <i>Reg1cp<sup>+/+</sup></i> | <i>Reg1cp<sup>+/-mut</sup></i> | <i>Reg1cp<sup>+/+</sup></i> | <i>Reg1cp<sup>+/-mut</sup></i> | <i>Reg1cp<sup>+/+</sup></i> | <i>Reg1cp<sup>+/-mut</sup></i> | <i>Reg1cp<sup>+/+</sup></i> | <i>Reg1cp<sup>+/-mut</sup></i> |
| 20–50    | BMD (g/cm <sup>2</sup> ) | 0.930 ± 0.111               | 1.063 ± 0.106 <sup>a</sup>     | 0.801 ± 0.125               | 0.957 ± 0.108 <sup>a</sup>     | 0.904 ± 0.123               | 1.057 ± 0.126 <sup>a</sup>     | 237                         | 13                             |
|          | Z-score                  | -0.271 ± 1.025              | 0.851 ± 0.970 <sup>a</sup>     | -0.314 ± 1.102              | 1.255 ± 0.885 <sup>a</sup>     | -0.217 ± 1.114              | 1.213 ± 1.107 <sup>a</sup>     |                             |                                |
| ≥50      | BMD(g/cm <sup>2</sup> )  | 0.932 ± 0.135               | 1.104 ± 0.110 <sup>a</sup>     | 0.737 ± 0.105               | 0.879 ± 0.099 <sup>a</sup>     | 0.877 ± 0.112               | 1.031 ± 0.098 <sup>a</sup>     | 353                         | 13                             |
|          | Z-score                  | -0.069 ± 0.966              | 1.188 ± 0.783 <sup>a</sup>     | -0.063 ± 0.999              | 1.346 ± 0.854 <sup>a</sup>     | 0.096 ± 0.962               | 1.461 ± 0.754 <sup>a</sup>     |                             |                                |

<sup>a</sup>P < 0.05, compared with the *Reg1cp<sup>+/+</sup>* control.

Table S3. Index of bone mass in 41 female *Reg1cp<sup>+/-mut</sup>* individuals and 808 female *Reg1cp<sup>+/+</sup>* individuals

| Period         | Index                    | Lumbar                      |                                | Femoral neck                |                                | Hip                         |                                | Subjects (n)                |                                |
|----------------|--------------------------|-----------------------------|--------------------------------|-----------------------------|--------------------------------|-----------------------------|--------------------------------|-----------------------------|--------------------------------|
|                |                          | <i>Reg1cp<sup>+/+</sup></i> | <i>Reg1cp<sup>+/-mut</sup></i> | <i>Reg1cp<sup>+/+</sup></i> | <i>Reg1cp<sup>+/-mut</sup></i> | <i>Reg1cp<sup>+/+</sup></i> | <i>Reg1cp<sup>+/-mut</sup></i> | <i>Reg1cp<sup>+/+</sup></i> | <i>Reg1cp<sup>+/-mut</sup></i> |
| Premenopausal  | BMD (g/cm <sup>2</sup> ) | 0.955 ± 0.104               | 1.068 ± 0.120 <sup>a</sup>     | 0.773 ± 0.100               | 0.901 ± 0.118 <sup>a</sup>     | 0.854 ± 0.104               | 0.983 ± 0.113 <sup>a</sup>     | 357                         | 20                             |
|                | Z-score                  | 0.156 ± 0.959               | 1.084 ± 1.103 <sup>a</sup>     | -0.105 ± 0.976              | 1.040 ± 1.083 <sup>a</sup>     | 0.031 ± 0.996               | 1.095 ± 0.991 <sup>a</sup>     |                             |                                |
| Postmenopausal | BMD (g/cm <sup>2</sup> ) | 0.801 ± 0.129               | 1.002 ± 0.156 <sup>a</sup>     | 0.661 ± 0.100               | 0.864 ± 0.123 <sup>a</sup>     | 0.743 ± 0.113               | 0.942 ± 0.119 <sup>a</sup>     | 451                         | 21                             |
|                | Z-score                  | 0.166 ± 0.965               | 1.290 ± 0.998 <sup>a</sup>     | -0.051 ± 0.881              | 1.423 ± 0.766 <sup>a</sup>     | -0.535 ± 1.015              | 1.022 ± 0.916 <sup>a</sup>     |                             |                                |

<sup>a</sup>P < 0.05, compared with the *Reg1cp<sup>+/+</sup>* control.

Table S4. Biochemical survey for bone remodeling parameters in 26 male *Reg1cp<sup>+/-mut</sup>* individuals and 226 male *Reg1cp<sup>+/+</sup>* individuals

| Age (yr) | Index     | PINP (ng/ml)                |                                | β-CTX (pg/ml)               |                                | Subjects (n)                |                                |
|----------|-----------|-----------------------------|--------------------------------|-----------------------------|--------------------------------|-----------------------------|--------------------------------|
|          |           | <i>Reg1cp<sup>+/+</sup></i> | <i>Reg1cp<sup>+/-mut</sup></i> | <i>Reg1cp<sup>+/+</sup></i> | <i>Reg1cp<sup>+/-mut</sup></i> | <i>Reg1cp<sup>+/+</sup></i> | <i>Reg1cp<sup>+/-mut</sup></i> |
| 20–29    | Mean ± SD | 65.85 ± 9.84                | 79.74 ± 13.74 <sup>a</sup>     | 516.05 ± 32.65              | 528.04 ± 123.08                | 45                          | 3                              |
|          | Range     | 44.53~87.80                 | 64.07~89.75                    | 432.73~578.84               | 386.06~604.56                  |                             |                                |
| 30–39    | Mean ± SD | 53.32 ± 7.92                | 63.22 ± 10.20 <sup>a</sup>     | 395.49 ± 32.93              | 411.68 ± 34.25                 | 40                          | 5                              |
|          | Range     | 40.06~70.61                 | 52.33~79.75                    | 315.86~453.57               | 377.22~469.07                  |                             |                                |
| 40–49    | Mean ± SD | 42.46 ± 7.61                | 50.28 ± 7.94 <sup>a</sup>      | 360.25 ± 31.01              | 375.27 ± 24.11                 | 40                          | 5                              |
|          | Range     | 25.48~61.33                 | 44.56~63.08                    | 307.23~413.25               | 337.48~396.11                  |                             |                                |
| 50–59    | Mean ± SD | 36.97 ± 8.10                | 51.46 ± 7.32 <sup>a</sup>      | 351.47 ± 40.50              | 355.57 ± 41.38                 | 42                          | 7                              |
|          | Range     | 22.02~60.35                 | 43.80~65.60                    | 268.61~448.58               | 282.98~405.99                  |                             |                                |
| 60–69    | Mean ± SD | 35.53 ± 8.37                | 49.72 ± 3.64 <sup>a</sup>      | 314.28 ± 34.47              | 338.71 ± 36.52                 | 35                          | 4                              |
|          | Range     | 21.36~54.08                 | 47.63~55.15                    | 260.59~386.03               | 304.95~389.66                  |                             |                                |
| 70–79    | Mean ± SD | 26.96 ± 5.91                | 44.40 ± 9.14                   | 285.58 ± 37.19              | 317.32 ± 25.16                 | 24                          | 2                              |
|          | Range     | 18.11~39.51                 | 37.94~50.86                    | 232.13~344.26               | 299.53~335.11                  |                             |                                |

<sup>a</sup>P < 0.05, compared with the *Reg1cp<sup>+/+</sup>* control.

Table S5. Biochemical survey for bone remodeling parameters in 41 female *Reg1cp<sup>+/-mut</sup>* individuals and 213 female *Reg1cp<sup>+/+</sup>* individuals

| Age (yr) | Index     | PINP (ng/ml)                |                                | β-CTX (pg/ml)               |                                | Subjects (n)                |                                |
|----------|-----------|-----------------------------|--------------------------------|-----------------------------|--------------------------------|-----------------------------|--------------------------------|
|          |           | <i>Reg1cp<sup>+/+</sup></i> | <i>Reg1cp<sup>+/-mut</sup></i> | <i>Reg1cp<sup>+/+</sup></i> | <i>Reg1cp<sup>+/-mut</sup></i> | <i>Reg1cp<sup>+/+</sup></i> | <i>Reg1cp<sup>+/-mut</sup></i> |
| 20–29    | Mean ± SD | 56.61 ± 13.12               | 68.85 ± 0.93                   | 388.44 ± 47.01              | 436.95 ± 7.27                  | 42                          | 2                              |
|          | Range     | 40.77–81.63                 | 68.19–69.51                    | 300.48–578.15               | 431.81–442.10                  |                             |                                |
| 30–39    | Mean ± SD | 41.84 ± 7.99                | 60.84 ± 4.70 <sup>a</sup>      | 291.80 ± 32.47              | 311.56 ± 54.30                 | 42                          | 9                              |
|          | Range     | 30.14–59.40                 | 51.17–66.54                    | 222.20–341.78               | 243.55–385.53                  |                             |                                |
| 40–49    | Mean ± SD | 40.55 ± 10.51               | 49.67 ± 12.33 <sup>a</sup>     | 292.54 ± 32.31              | 311.62 ± 49.75                 | 39                          | 17                             |
|          | Range     | 27.00–81.73                 | 28.97–77.13                    | 234.81–366.37               | 201.04–380.48                  |                             |                                |
| 50–59    | Mean ± SD | 44.08 ± 6.86                | 50.71 ± 9.15 <sup>a</sup>      | 381.61 ± 33.51              | 399.55 ± 35.37                 | 40                          | 10                             |
|          | Range     | 28.02–60.34                 | 36.62–62.96                    | 317.20–442.08               | 349.38–472.44                  |                             |                                |
| 60–69    | Mean ± SD | 45.00 ± 6.65                | 47.35 ± 9.26                   | 395.59 ± 43.58              | 410.71 ± 4.95                  | 31                          | 2                              |
|          | Range     | 29.00–58.31                 | 40.81–53.90                    | 343.11–564.17               | 407.22–414.21                  |                             |                                |
| 70–79    | Mean ± SD | 43.03 ± 6.69                | 46.15                          | 351.13 ± 31.22              | 382.61                         | 19                          | 1                              |
|          | Range     | 32.19–55.93                 | -                              | 302.00–403.67               | -                              |                             |                                |

<sup>a</sup>P < 0.05, compared with the *Reg1cp<sup>+/+</sup>* control.



Table S6. **Top 21 selected small molecules**

| <b>ID</b> | <b>Grid score</b> | <b>Rank</b> | <b>Name</b>                             | <b>CAS</b>  | <b>Molecule information</b>                                                                                             |
|-----------|-------------------|-------------|-----------------------------------------|-------------|-------------------------------------------------------------------------------------------------------------------------|
| TMA0820   | -72.72            | 1           | Calenduloside E                         | 26020-14-4  | <a href="https://pubchem.ncbi.nlm.nih.gov/compound/176079">https://pubchem.ncbi.nlm.nih.gov/compound/176079</a>         |
| TMA0493   | -63.08            | 2           | Theaflavin 3'-O-gallate                 | 28543-07-9  | <a href="https://pubchem.ncbi.nlm.nih.gov/compound/71307578">https://pubchem.ncbi.nlm.nih.gov/compound/71307578</a>     |
| TMA1113   | -62.99            | 3           | Ophiopogonin D                          | 41753-55-3  | <a href="https://pubchem.ncbi.nlm.nih.gov/compound/46173859">https://pubchem.ncbi.nlm.nih.gov/compound/46173859</a>     |
| TMA0902   | -61.43            | 4           | Picfeltarraenin IB                      | 97230-46-1  | <a href="https://pubchem.ncbi.nlm.nih.gov/compound/102120501">https://pubchem.ncbi.nlm.nih.gov/compound/102120501</a>   |
| TMA2594   | -61.40            | 5           | Tetracycline hydrochloride              | 64-75-5     | <a href="https://pubchem.ncbi.nlm.nih.gov/compound/54704426">https://pubchem.ncbi.nlm.nih.gov/compound/54704426</a>     |
| TMA1054   | -60.65            | 6           | Grosvenorine                            | 156980-60-8 | <a href="https://pubchem.ncbi.nlm.nih.gov/compound/101568804">https://pubchem.ncbi.nlm.nih.gov/compound/101568804</a>   |
| TMA1923   | -59.80            | 7           | Narirutin                               | 14259-46-2  | <a href="https://pubchem.ncbi.nlm.nih.gov/compound/442431">https://pubchem.ncbi.nlm.nih.gov/compound/442431</a>         |
| TMA0997   | -59.13            | 8           | Ganoderic Acid G                        | 98665-22-6  | <a href="https://pubchem.ncbi.nlm.nih.gov/compound/20055988">https://pubchem.ncbi.nlm.nih.gov/compound/20055988</a>     |
| TMA1641   | -58.89            | 9           | Isosaponarin                            | 19416-87-6  | <a href="https://pubchem.ncbi.nlm.nih.gov/compound/154105">https://pubchem.ncbi.nlm.nih.gov/compound/154105</a>         |
| TMA0922   | -58.15            | 10          | Corilagin                               | 23094-69-1  | <a href="https://pubchem.ncbi.nlm.nih.gov/substance/254771366">https://pubchem.ncbi.nlm.nih.gov/substance/254771366</a> |
| TMA1513   | -57.54            | 11          | Punicalagin                             | 65995-63-3  | <a href="https://pubchem.ncbi.nlm.nih.gov/substance/254782436">https://pubchem.ncbi.nlm.nih.gov/substance/254782436</a> |
| TMA1421   | -55.81            | 12          | Sanggenon C                             | 80651-76-9  | <a href="https://pubchem.ncbi.nlm.nih.gov/substance/254785279">https://pubchem.ncbi.nlm.nih.gov/substance/254785279</a> |
| TMA0545   | -55.04            | 13          | Polyporenic acid C                      | 465-18-9    | <a href="https://pubchem.ncbi.nlm.nih.gov/substance/366940831">https://pubchem.ncbi.nlm.nih.gov/substance/366940831</a> |
| TMA1553   | -54.42            | 14          | Silicristin                             | 33889-69-9  | <a href="https://pubchem.ncbi.nlm.nih.gov/substance/355202202">https://pubchem.ncbi.nlm.nih.gov/substance/355202202</a> |
| TMA1512   | -53.73            | 15          | Punicalin                               | 65995-64-4  | <a href="https://pubchem.ncbi.nlm.nih.gov/substance/312811563">https://pubchem.ncbi.nlm.nih.gov/substance/312811563</a> |
| TMA1085   | -53.25            | 16          | 7-(deoxyadenosin-N(6)-yl)aristolactam I | 127191-86-0 | <a href="https://pubchem.ncbi.nlm.nih.gov/substance/366187468">https://pubchem.ncbi.nlm.nih.gov/substance/366187468</a> |
| TMA1207   | -52.51            | 17          | Procyanidin B1                          | 20315-25-7  | <a href="https://pubchem.ncbi.nlm.nih.gov/substance/347759397">https://pubchem.ncbi.nlm.nih.gov/substance/347759397</a> |
| TMI0945   | -51.86            | 18          | Enoxolone                               | 471-53-4    | <a href="https://pubchem.ncbi.nlm.nih.gov/substance/363901912">https://pubchem.ncbi.nlm.nih.gov/substance/363901912</a> |
| TMA1555   | -50.79            | 19          | Silydianin                              | 29782-68-1  | <a href="https://pubchem.ncbi.nlm.nih.gov/substance/348955837">https://pubchem.ncbi.nlm.nih.gov/substance/348955837</a> |
| TMA0416   | -50.69            | 20          | $\alpha$ -Viniferin                     | 62218-13-7  | <a href="https://pubchem.ncbi.nlm.nih.gov/substance/254761476">https://pubchem.ncbi.nlm.nih.gov/substance/254761476</a> |
| TMA0598   | -50.44            | 21          | Etoposide                               | 33419-42-0  | <a href="https://pubchem.ncbi.nlm.nih.gov/substance/374243615">https://pubchem.ncbi.nlm.nih.gov/substance/374243615</a> |

CAS, Chemical Abstracts Service.

Table S7. **Nucleotide sequences of primers used for quantitative RT-PCR detection**

| <b>Primer</b>   | <b>Sequence (5' to 3')</b>    | <b>Size</b> |
|-----------------|-------------------------------|-------------|
| Reg1CP (human)  | F: GGGAGCTTTGTGTAGAGAACTG     | 25          |
|                 | R: CTCCTCACTCACATCTGCATAAACC  | 25          |
| CD31(human)     | F: AACAGTGTTGACATGAAGAGCC     | 22          |
|                 | R: TGTA AACAGCAGCAGTCATCCTT   | 22          |
| EMCN (human)    | F: AGCAACCAGCCGGTCTTATTC      | 21          |
|                 | R: AGCACATTCGGTACAAACCCA      | 21          |
| VEGFa (human)   | F: AGGGCAGAATCATCACGAAGT      | 21          |
|                 | R: AGGGTCTCGATTGGATGGCA       | 20          |
| VEGFb (human)   | F: GAGATGTCCCTGGAAGAACA       | 22          |
|                 | R: GAGTGGGATGGGTGATGTCAG      | 21          |
| PDGFa (human)   | F: GCAAGACCAGGACGGTCATTT      | 21          |
|                 | R: GGCACCTTGACACTGCTCGT       | 19          |
| PDGFb (human)   | F: CTAATGGTGAAACCCACAACG      | 22          |
|                 | R: TATCGCCAGGAATTGTTGCTG      | 21          |
| FGF-1 (human)   | F: ACAGCCCTGACCGAGAAGTT       | 20          |
|                 | R: CCGTTGCTACAGTAGAGGAGT      | 21          |
| TGFβ-1 (human)  | F: GGCCAGATCCTGTCCAAGC        | 19          |
|                 | R: GTGGGTTTCCACCATTAGCAC      | 21          |
| JunB (human)    | F: ACAAACTCCTGAAACCGAGCC      | 21          |
|                 | R: CGAGCCCTGACCAGAAAAGTA      | 21          |
| β-actin (human) | F: CGTGGACATCCGCAAAGAC        | 19          |
|                 | R: TCGTCATACTCCTGCTTGTCTG     | 21          |
| Klf3 (mouse)    | F: TACAGGAGAAAAGCCGTACAAATG   | 24          |
|                 | R: TCATCAGACCGAGCGAACTTC      | 21          |
| JunB (mouse)    | F: CCAGATCTCGGATGTGCACGAAAATG | 26          |
|                 | R: GCAAGAATTCGGAGGCTCTCAGAAGG | 26          |
| VEGFa (mouse)   | F: CTGCCGTCGGATTGAGACC        | 19          |
|                 | R: CCCCTCCTGTACCACTGTC        | 20          |
| Axin2 (mouse)   | F: TGA CTCTCCTTCCAGATCCCA     | 21          |
|                 | R: TGCCACACTAGGCTGACA         | 19          |
| Wisp1 (mouse)   | F: CAGCACCCTAGAGGAAACGA       | 21          |
|                 | R: CTGGGCACATATCTTACAGCATT    | 23          |
| Bmp4 (mouse)    | F: TTCCTGGTAACCGAATGCTGA      | 21          |
|                 | R: CCTGAATCTCGGCGACTTTTT      | 21          |
| Ccnd1 (mouse)   | F: GCGTACCCTGACACCAATCTC      | 21          |
|                 | R: CTCCTCTTCGCACTTCTGCTC      | 21          |
| Nkd2 (mouse)    | F: GAGCGGAAGAAACGGACCG        | 19          |
|                 | R: CCTTAGGGTCTCCATTGAGCA      | 21          |
| Opg (mouse)     | F: ACCCAGAACTGGTCATCAGC       | 21          |
|                 | R: CTGCAATACACACTCATCACT      | 23          |
| Tph1 (mouse)    | F: TTTCCATCCGCTCCTGTGG        | 18          |
|                 | R: TCATCTTCTCTTTGCATCTTC      | 22          |

Table S7. **Nucleotide sequences of primers used for quantitative RT-PCR detection (Continued)**

| Primer          | Sequence (5' to 3')    | Size |
|-----------------|------------------------|------|
| β-Actin (mouse) | F: CTGTCCCTGTATGCCTCTG | 19   |
|                 | R: TGATGTCACGCACGATTT  | 18   |

F, forward primer; R, reverse primer; Size, primer size.

Table S8. **Nucleotide sequences of primers used for CHIP-PCR**

| Primer         | Sequence (5' to 3')     |
|----------------|-------------------------|
| JunB-1 (human) | F: GGGCTGTTGCCCACTTC    |
|                | R: CCTCCCCTATTGACCCTG   |
| JunB-2 (human) | F: TTACAAGGACACGCGCTTCC |
|                | R: GCCTGAGCCACACGCCTT   |

F, forward primer; R, reverse primer.

Table S9. **Information from the biotin-labeled probe used for EMSA**

| Oligo name | Items                                    | Bases | Purification | Working solution |
|------------|------------------------------------------|-------|--------------|------------------|
| JunB(G)-TP | 5'biotin-TTGGGCGACCGCGCCCCAGCCGTCGGGC-3' | 28    | HAP          | 238 nM           |
| JunB(G)-BM | 5'biotin-GCCCGACGGCTGGGGCGCGGTGCCCCAA-3' | 28    | HAP          | 238 nM           |
| JunB(A)-TP | 5'biotin-CCGCCGAGCCACCCGGCCCGTGGCCGCT-3' | 28    | HAP          | 238 nM           |
| JunB(A)-BM | 5'biotin-AGCGGCCACGGGCCGGGTGGCTCGGCGG-3' | 28    | HAP          | 238 nM           |
